# Supplementary material for: A novel method for correcting water budget components and reducing their uncertainties by optimally distributing the imbalance residual without full closure
Source: Copernicus journal article supplement (doi:10.5194/egusphere-2025-990), 2025-04-22
Supplement: Supplementary file [file egusphere-2025-990-AC4-supplement.pdf]

## Response to Review

Reviewer #1 (RC2):

Thanks to the authors team for a careful response to the two comments. From the text revisions that you show I can see that all substantive points have been adequately addressed and that the manuscript will now be an important contribution to the literature. Congratulations.

**Response:** Thank you very much for your positive and constructive review, which helped us to improve the manuscript greatly. Thank you again.
